# Supplementary material for: Analysis of Cadmium-Stress-Induced microRNAs and Their Targets Reveals bra-miR172b-3p as a Potential Cd2+-Specific Resistance Factor in Brassica juncea
Source: MDPI journal article supplement (doi:10.3390/pr9071099), 2021-06-24
Supplement: s1 [file s1]

**Supplementary Table S1 Primers for RT-PCR**

| <b>Genes/miRNAs</b>                | <b>Primer sequences</b>                  |
|------------------------------------|------------------------------------------|
| <i>AT3G04320</i>                   | Forward: 5'-GCTGATGTCTAAGATTCCTGCTC-3'   |
|                                    | Reverse: 5'-GTGGTTGAAATCATCATGCAGT-3'    |
| <i>FLA9</i>                        | Forward: 5'-CACAAGCTTTCCCCGATTGC-3'      |
|                                    | Reverse: 5'-GCGCTGCAGCCTTTTTACTT-3'      |
| <i>ATCAT3</i>                      | Forward: 5'-CAGCTAAAGCAAAGACGTGACAA-3'   |
|                                    | Reverse: 5'-GACATGAACCAGTACCCTTTGG-3'    |
| <i>ATCCS</i>                       | Forward: 5'-GATCTACTGGATTTCTGTGCTCT-3'   |
|                                    | Reverse: 5'-GCTGTAATGTTTTGGTGTCCCT-3'    |
| <i>DOX1</i>                        | Forward: 5'-AACTCCCGCACACCTTGG-3'        |
|                                    | Reverse: 5'-ACTAGGCTTAGAATAAACTACCAGT-3' |
| <i>ATKT1</i>                       | Forward: 5'-CTGGTCCACAAGACTCAGGG-3'      |
|                                    | Reverse: 5'-AACGCCGATTCATCCACGA-3'       |
| <i><math>\beta</math>-tubulin2</i> | Forward: 5'-GTCTGTGACATAGCGCCTCG-3'      |
|                                    | Reverse: 5'-GAACTGCTCACTCACCTCC-3'       |
| bra-miR172b-3p                     | Forward: 5'-TGCGCAGAATCTTGATGATGC-3'     |
|                                    | Reverse: 5'-CCAGTGCAGGGTCCGAGGTATT-3'    |
| mireap-2590                        | Forward: 5'-TGCGCGGCTAAGTCCGTTTCG-3'     |
|                                    | Reverse: 5'-CCAGTGCAGGGTCCGAGGTATT-3'    |
| bra-miR398-3p                      | Forward: 5'-TGCGCTGTGTTCTCAGGTCAC-3'     |
|                                    | Reverse: 5'-CCAGTGCAGGGTCCGAGGTATT-3'    |
